# Supplementary material for: Separation, characterization and hypoglycemic activity in vitro evaluation of a low molecular weight heteropolysaccharide from the fruiting body of Phellinus pini
Source: Royal Society of Chemistry journal article supplement (doi:10.1039/d1fo00297j), 2021-01-01
Supplement: d1fo00297j1.pdf [file d1fo00297j1.pdf]

## Supporting Information

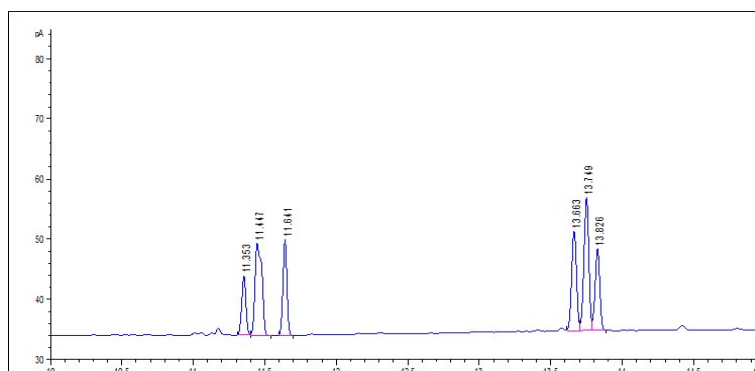

**Supplementary Fig. 1.** Gas chromatography (GC) of acetyl derivatives of mixed standard monosaccharides. From left to right, Rha (Rt = 11.353 min), Fuc (Rt = 11.447 min), Xyl (Rt = 11.641 min), Man (Rt = 13.663 min), Glu (Rt = 13.749 min), Gal (Rt = 13.826 min), Rt represents retention time.

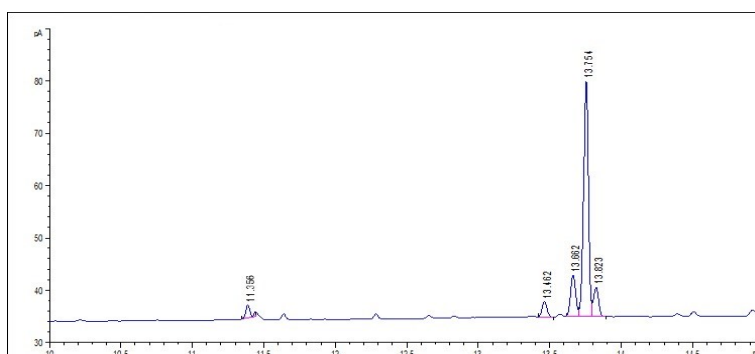

**Supplementary Fig. 2.** Gas chromatography (GC) of acetyl derivatives of PPW-1.

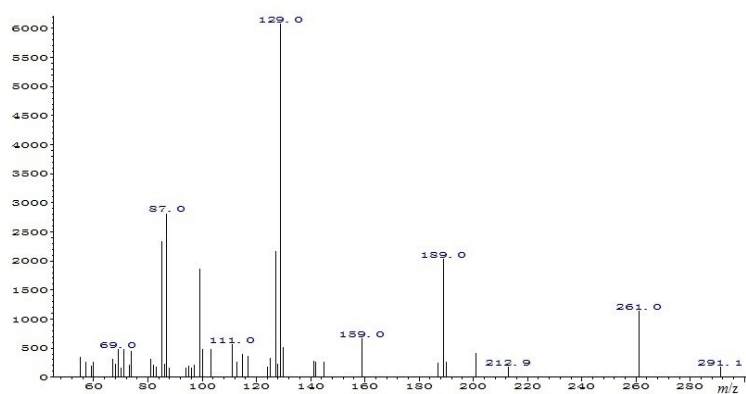

**Supplementary Fig. 3.** MS spectra of PPW-1 acetylated derivatives

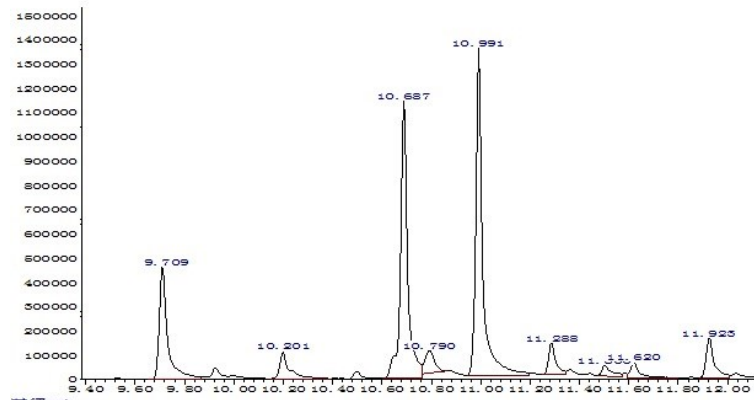

**Supplementary Fig. 4.** Total ion chromatography (TIC) of PPW-1 methylated derivatives by GC-MS.
